# Supplementary material for: Nitrogen-doped carbon derived from horse manure biomass as a catalyst for the oxygen reduction reaction
Source: Royal Society of Chemistry journal article supplement (doi:10.1039/d2ra02079c), 2022-01-01
Supplement: d2ra02079c1.pdf [file d2ra02079c1.pdf]

## Supporting Information

### **Nitrogen-doped carbon derived from horse manure biomass as a catalyst for the oxygen reduction reaction†**

Gasidit Panomsuwan<sup>a,b,c\*</sup>, Chadapat Hussakan<sup>a,b</sup>, Napat Kaewtrakulchai<sup>d</sup>, Ratchatee Techapiesancharoenkij<sup>a,b</sup>, Ai Serizawa<sup>e</sup>, Takahiro Ishizaki<sup>e</sup>, and Apiluck Eiad-ua<sup>f,\*</sup>

<sup>a</sup> Department of Materials Engineering, Faculty of Engineering, Kasetsart University, Bangkok 10900, Thailand

<sup>b</sup> International Collaborative Education Program for Materials Technology, Education, and Research (ICE-Matter), ASEAN University Network/Southeast Asia Engineering Education Development Network (AUN/SEED-Net), Kasetsart University, Bangkok 10900, Thailand

<sup>c</sup> Special Research Unit for Biomass Conversion Technology for Energy and Environmental Materials, Kasetsart University, Bangkok 10900, Thailand

<sup>d</sup> Kasetsart Agricultural and Agro-Industrial Product Improvement Institute, Kasetsart University, Bangkok 10900, Thailand

<sup>e</sup> Department of Materials Science and Engineering, Faculty of Engineering, Shibaura Institute of Technology, Tokyo 135-8548, Japan

<sup>f</sup> College of Materials Innovation and Technology, King Mongkut's Institute of Technology Ladkrabang, Bangkok 10520, Thailand

\*Corresponding authors: gasidit.p@ku.ac.th (G. Panomsuwan); apiluck.ei@kmitl.ac.th (A. Eiad-ua)

**Table S1.** Production yields of hydrochars and HMNCs derived from horse manure at different ammonia concentrations.

| Sample   | Hydrochar yield (%) | HMNC yield (%) |
|----------|---------------------|----------------|
| HMNC-0   | 74.12               | 31.24          |
| HMNC-0.5 | 71.72               | 27.31          |
| HMNC-1.0 | 68.26               | 26.57          |
| HMNC-1.5 | 65.73               | 23.92          |

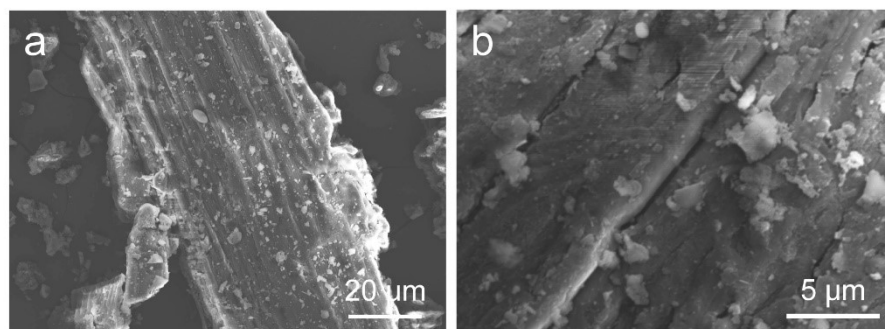

**Fig. S1.** SEM image of horse manure.

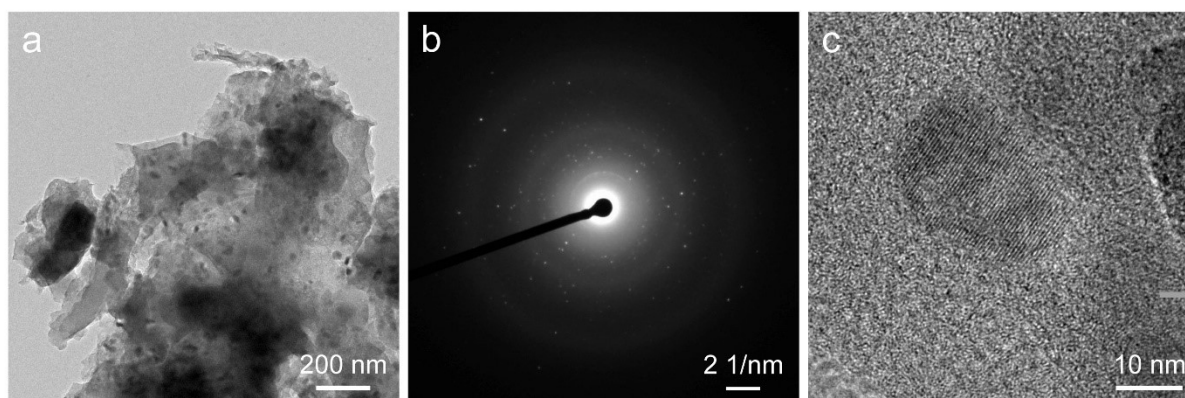

**Fig. S2.** TEM images and SAED pattern of HMNC-1.0.

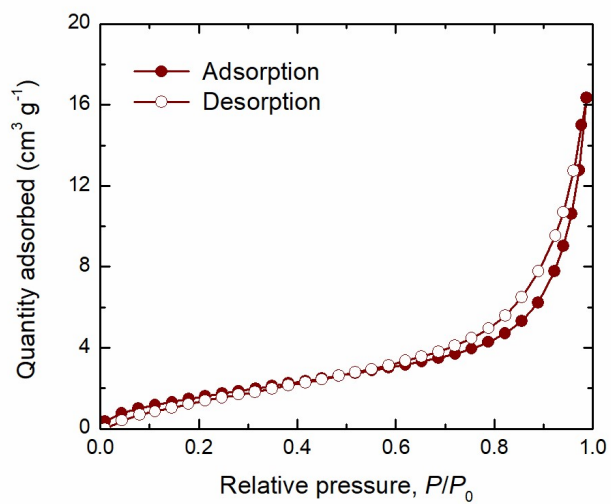

**Fig. S3.** N<sub>2</sub> adsorption-desorption isotherm of horse manure.

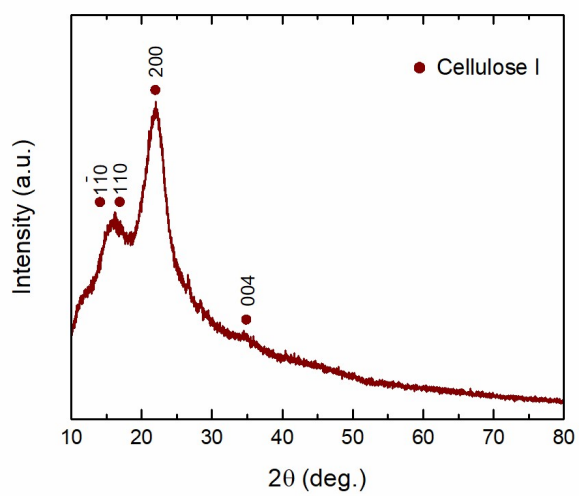

**Fig. S4.** XRD pattern of horse manure corresponding to the crystalline cellulose I structure.

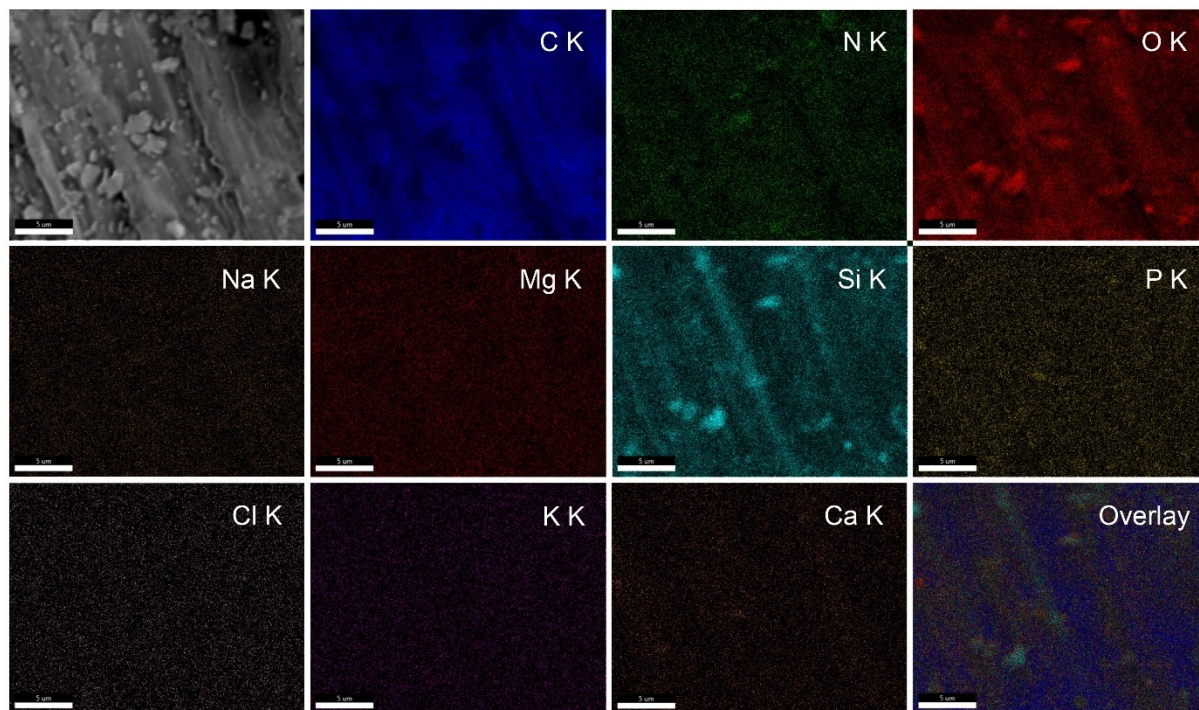

**Fig. S5.** SEM-EDS mapping analysis of horse manure.

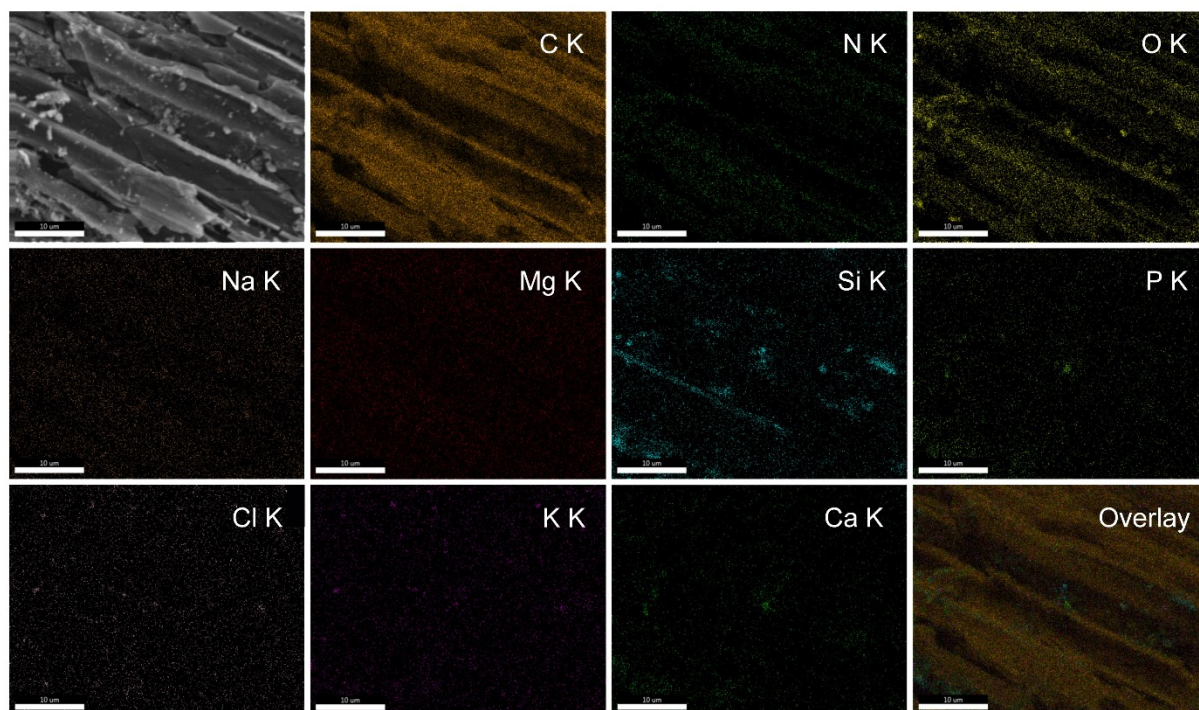

**Fig. S6.** SEM-EDS mapping analysis of HMNC-1.0.



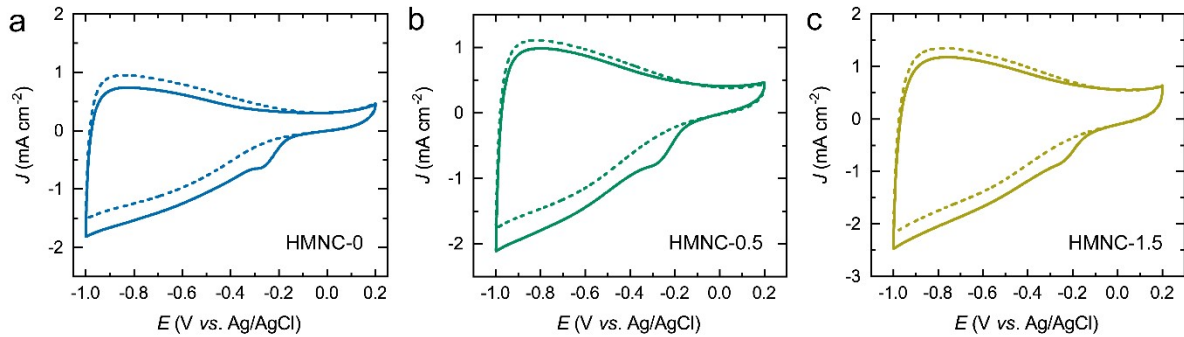

**Fig. S7.** CV curves measured in 0.1 M KOH solution with the saturation of  $N_2$  (dashed line) and  $O_2$  (solid line) at a scan rate of  $50 \text{ mV s}^{-1}$ : (a) HMNC-0, (b) HMNC-0.5, and (c) HMNC-1.5.

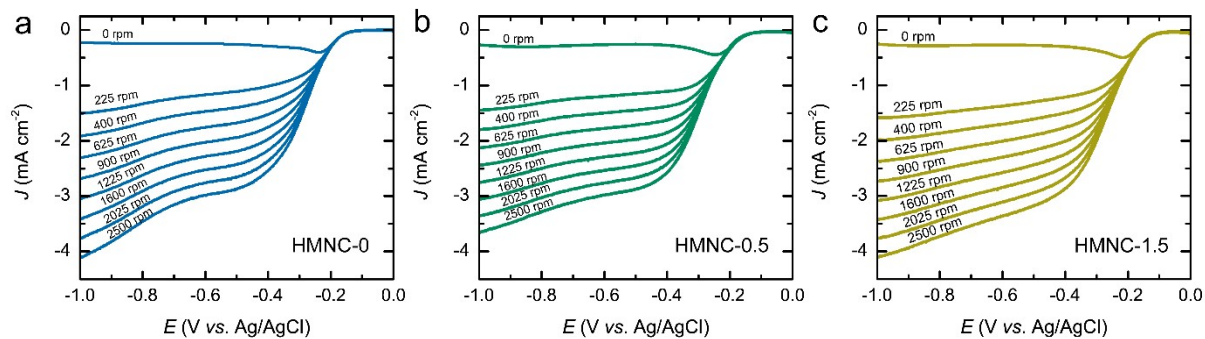

**Fig. S8.** LSV curves measured at various rotation speeds from 225 to 2500 rpm in  $O_2$ -saturated 0.1 M KOH solution at a scan rate of  $10 \text{ mV s}^{-1}$ : (a) HMNC-0, (b) HMNC-0.5, and (c) HMNC-1.5. Note: The current density was subtracted from the capacitive current measured in the  $N_2$ -saturated electrolyte.

**Table S2.** Comparison ORR results of the biomass-derived nitrogen-doped carbon materials in 0.1 M KOH. The ORR onset potential ( $E_{\text{onset}}$ ) and half-wave potential ( $E_{1/2}$ ) in  $\text{O}_2$ -saturated 0.1 M KOH are given with respect to Ag/AgCl.

| Catalysts             | Biomass                | Surface area ( $\text{m}^2 \text{g}^{-1}$ ) | Pore volume ( $\text{cm}^3 \text{g}^{-1}$ ) | Nitrogen content (atom%) | $E_{\text{onset}}$ (V) | Electron transfer number ( $n$ ) | Catalyst loading ( $\text{mg cm}^{-2}$ ) | Reference |
|-----------------------|------------------------|---------------------------------------------|---------------------------------------------|--------------------------|------------------------|----------------------------------|------------------------------------------|-----------|
| CD                    | Cow dung               | 128.5                                       | 0.091                                       | -                        | -0.12                  | -                                | 0.203                                    | S1        |
| CS                    | Chitin                 | 100                                         | 0.06                                        | 3.69                     | -0.17                  | 3.63 @-0.7 V                     | 0.202                                    | S2        |
| NCA-K-900             | Chicken feather rachis | 183.2                                       | 0.238                                       | 2.3                      | -0.02                  | 3.5 @-0.7 V<br>2.5 @-0.5 V       | -                                        | S3        |
| CCB                   | Chicken bone           | 69                                          | -                                           | -                        | -0.19                  | -                                | -                                        | S4        |
| CCB <sub>1</sub>      | Chicken bone           | 294                                         | -                                           | -                        | -0.12                  | -                                | -                                        | S4        |
| CN <sub>x</sub> -1000 | Poultry feather        | -                                           | -                                           | 8.2                      | -0.195                 | -                                | 0.353                                    | S5        |
| CN <sub>x</sub> -950  | Chicken feather rachis | 4.77                                        | -                                           | 2.3                      | -0.20                  | -                                | 1.777                                    | S6        |
| CNA <sub>x</sub> -900 | Chicken feather rachis | 301.2                                       | -                                           | 4.3                      | -0.02                  | -                                | 1.777                                    | S6        |
| N-GLC                 | Bagasse                | 530                                         | -                                           | -                        | 0.07                   | ~4 @-0.4 V                       | 0.750                                    | S7        |
| CNPs-800              | <i>Allium sativum</i>  | 234.1                                       | 0.14                                        | -                        | -0.08                  | 3.8 @-0.5 V                      | -                                        | S8        |
| N-QD                  | Unripe peach           | -                                           | -                                           | 8.77                     | -0.05                  | 1.82 @-0.7 V                     | 1.76                                     | S9        |
| N-HPC                 | <i>Allium cepa</i>     | 1607                                        | -                                           | -                        | -0.10                  | 3.3 @-0.4 V                      | 0.141                                    | S10       |
| BCM                   | Pomelo peel            | 62.8                                        | 0.03                                        | 0.51                     | -0.23                  | 3.2 @-0.4 V                      | -                                        | S11       |
| a-BCM                 | Pomelo peel            | 314.3                                       | 0.22                                        | 2.41                     | -0.08                  | 3.6 @-0.4 V                      | -                                        | S11       |
| HMNC-1.0              | Horse manure           | 55.2                                        | 0.055                                       | 1.32                     | -0.15                  | 2.70 @-0.4V                      | 0.398                                    | This work |

## References

- [S1] Z. Zhang, H. Li, Y. Yang, J. Key, S. Ji, Y. Ma, H. Wang and R. Wang, *RSC Adv.* 2015, **5**, 27112–27119.
- [S2] H. Yuan, L. Deng, X. Cai, S. Zhou, Y. Chen and Y. Yuan, *RSC Adv.* 2015, **5**, 56121–56129.
- [S3] A. Tyagi, A. Yadav, P. Sinha, S. Singh, P. Paik and K. K. Kar, *Appl. Surf. Sci.* 2019, **495**, 143603.
- [S4] H. Song, H. Li, H. Wang, J. Key, S. Ji, X. Mao, R. Wang, *Electrochim. Acta* 2014, **147**, 520–526.
- [S5] R. Sharma and K. K. Kar, *Electrochim. Acta* 2016, **191**, 876–886.
- [S6] A. Tyagi, S. Banarjee, S. Singh and K. K. Kar, *Int. J. Hydrogen Energy* 2020, **45**, 16930–16943.
- [S7] D. Bosubabu, V. Parthiban, A. K. Sahu and K. Ramesha, *Bull. Mater. Sci.* 2021, **44**, 135.
- [S8] P. Kanagavalli, G. R. Pandey, V. S. Bhat, M. Veerapandian, G. Hedge, *J. Nanostruct. Chem.* 2021, **11**, 343–352.
- [S9] R. A. Thomas, N. Jebakumar, I. Edison and Y. R. Lee, *J. Colloid. Interf. Sci.* 2016, **482**, 8–18.
- [S10] J. Zhang, J. He, H. Zheng, R. Li and X. Gou, *J. Mater. Sci.* 2020, **55**, 7464–7476.
- [S11] Y. Zhang, L. Deng, H. Hu, Y. Qiao, H. Yuan, D. Chen, M. Chang and H. Wei, *Sustain. Energy Fuels* 2020, **4**, 1642–1653.
